# Supplementary material
Source: Royal Society of Chemistry journal article supplement (doi:10.1039/d6fo00521g)
Supplement: d6fo00521g1.pdf [file d6fo00521g1.pdf]

### Supplementary Tables and Figures

**Table S1** Primer sequences used in the real-time PCR.

| Gene                                | Sequence (5'–3')            | GenBank accession number |
|-------------------------------------|-----------------------------|--------------------------|
| Placental Function-Associated Genes |                             |                          |
| <i>syncytin-A</i>                   | F: CTGGGAATGAACCCACTGTTA    | NM_001013751.2           |
|                                     | R: GAGTTGAGGCAGAAGGAGTATG   |                          |
| <i>syncytin-B</i>                   | F : CCACCACCCATACGTTCAAA    | XM_030247799.1           |
|                                     | R : GGTTATAGCAGGTGCCGAAGAG  |                          |
| <i>FGF15</i>                        | F : GAGGACCAAACGAACGAAATT   | NM_008003.2              |
|                                     | R : ACGTCCTTGATGGCAATCG     |                          |
| <i>IGF2</i>                         | F : CTTGTTGACACGCTTCAGTTTG  | NM_001315488.1           |
|                                     | R : GGGTGGCACAGTATGTCTCC    |                          |
| <i>PIGF</i>                         | F : TGAGGAACCCACCTGTGATGCT  | XM_021202404.1           |
|                                     | R : CATTGAGCAGGGACGAGTTGGCT |                          |
| Antioxidant-related genes           |                             |                          |
| <i>Nrf2</i>                         | F : CTGGCTGATACTACCGCTGTT   | NM_010902.5              |
|                                     | R : GTGGAGAGGATGCTGCTGAA    |                          |
| <i>Keap1</i>                        | F : TCGAAGGCATCCACCCTAAG    | NM_016679.4              |
|                                     | R : CTCGAACCACGCTGTCAATCT   |                          |
| <i>NQO1</i>                         | F : ACTCGGAGAACTTTCAGTACC   | NM_008706.5              |

---

|                                      |                              |                |
|--------------------------------------|------------------------------|----------------|
|                                      | R : TTGGAGCAAAGTAGAGTGGT     |                |
| <i>CAT</i>                           | F : GGAGCAGGTGCTTTTGGATA     | NM_009804.2    |
|                                      | R : GAGGGTCACGAACTGTGTCA     |                |
| <i>SOD1</i>                          | F : TTTTTCGCGGGTCCTTTC       | XM_021185540.2 |
|                                      | R : CCATACTGATGGACGTGGAA     |                |
| <i>SOD2</i>                          | F : GGCCAAGGGAGATGTTACAA     | XM_021221177.1 |
|                                      | R : GAACCTTGGACTCCCACAGA     |                |
| Inflammatory Cytokine -related genes |                              |                |
| IL-6                                 | F : ACCACGGCCTTCCCTACTT      | NM_031168.2    |
|                                      | R : CACAACCTCTTTTCTCATTCCAC  |                |
| IL-8                                 | F : CCTACTTCAGCATCCTCTACTGG  | NM_001382458.1 |
|                                      | R : AGGGTTTCTTGAGAAGGGGAC    |                |
| IL-1 $\beta$                         | F : CTCGCAGCAGCACATCAACAAG   | NM_008361.4    |
|                                      | R : GGAAGGTCCACGGGAAAGACAC   |                |
| IL-10                                | F : AAAGAAGGCATGCACAGCTC     | NM_000572.3    |
|                                      | R : AAGCATGTTAGGCAGGTTGC     |                |
| TNF- $\alpha$                        | F : TCAGAATGAGGCTGGATAAG     | NM_001278601.1 |
|                                      | R : AGAGGTTTCAGTGATGTAGCG    |                |
| PPAR- $\gamma$                       | F : GTACTGTCCGGTTTCAGAAGTGCC | XM_021164281.2 |
|                                      | R : ATCTCCGCCAACAGCTTCTCCT   |                |
| Bile acid synthesis -related genes   |                              |                |
| FXR                                  | F : GCTAATGAGGACGACAGCGAAGG  | NM_001163700.1 |

---

---

|                |                               |                |
|----------------|-------------------------------|----------------|
|                | R : GTCTGTTGGTCTGCCGTGAGTTC   |                |
| Cyp7a1         | F : GGGCAGGCTTGGAATTTTG       | NM_007824.3    |
|                | R : ACAGCTACTAGGGGGCTTCA      |                |
| Cyp7b1         | F : GCCTTTTGGACTCGGAACAAG     | XM_006535383.3 |
|                | R : AATCGGGGTGCTGAATACCTAA    |                |
| Cyp27a1        | F : GAGAGTGAATCAGGGGACCA      | XM_006495607.4 |
|                | R : TCAGGAATGGAGGGTTTCAG      |                |
| $\beta$ -actin | F : TGGAATCCTGTGGCATCCATGAAAC | NM_007393.5    |
|                | R : TAAAACGCAGCTCAGTAACAGTCCG |                |

---

PIGF, Placental Growth Factor; FGF15, Fibroblast Growth Factor 15; IGF2, Insulin-like Growth Factor 2; Nrf2, nuclear factor erythroid 2-related factor 2; Keap1, Kelch-Like ECH-Associated Protein 1; NQO1, NAD(P)H:Quinone Oxidoreductase 1; CAT, Catalase; SOD1, Superoxide Dismutase 1; SOD2, superoxide dismutase 2; IL-6, Interleukin-6; IL-8, Interleukin-8; IL-1 $\beta$ , Interleukin- 1 Beta; IL-10, Interleukin-10; TNF- $\alpha$ , Tumor Necrosis Factor-Alpha; PPAR- $\gamma$ , Peroxisome Proliferator-Activated Receptor Gamma; FXR, Farnesoid X Receptor; Cyp7a1, Cytochrome P450 Family 7 Subfamily A Member 1; Cyp7b1, Cytochrome P450 Family 7 Subfamily B Member 1; Cyp27a1, Cytochrome P450 Family 27 Subfamily A Member 1;  $\beta$ -actin, Beta-Actin.

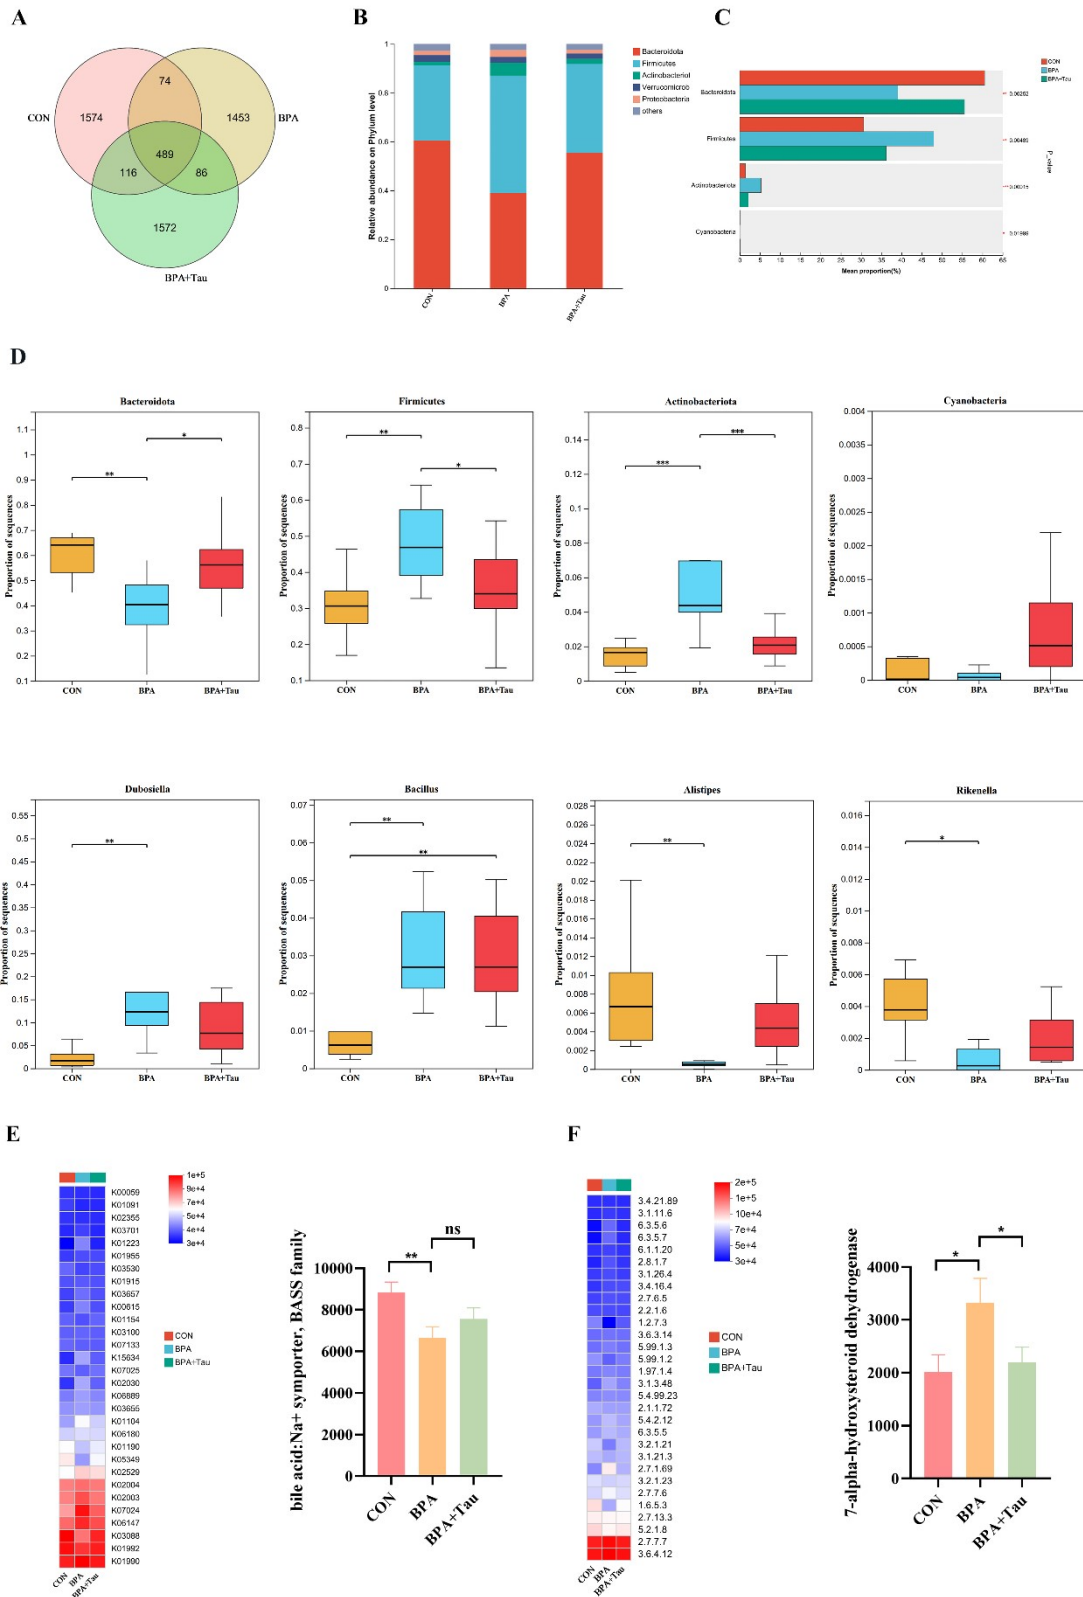

**Fig S1. Maternal taurine supplementation on fecal microbiota in BPA-exposed pregnant mice.** (A) Venn diagram of shared ASVs; (B) Microbial composition at the phylum level; (C) Differential analysis of microbial composition at the phylum level;

(D) Differential analysis of microbial composition at the genus level, (E) KEGG-based functional prediction-bile acid: Na<sup>+</sup> symporter (BASS family); (F) Functional prediction of enzyme abundance: 7 $\alpha$ -hydroxysteroid dehydrogenase (7 $\alpha$ -HSDH). CON, control group; BPA, bisphenol A-exposed group; BPA+Tau, bisphenol A-exposed+ taurine. ns, no significance; \* $P < 0.05$ ; \*\* $P < 0.01$ ; \*\*\* $P < 0.001$ .
